# Supplementary material for: Circulating Exosomal miR-144-3p from Crohn's Disease Patients Inhibits Human Umbilical Vein Endothelial Cell Function by Targeting FN1
Source: PubMed Central journal article supplement (PMC9184168; doi:10.1155/2022/8219557), 2022-06-02
Supplement: 8219557.f1.pdf [file 8219557.f1.pdf]

Table S1 Demographic of Healthy controls and CD patients.

|                          | Healthy control | CD        | <i>p</i> value |
|--------------------------|-----------------|-----------|----------------|
| Number                   | 15              | 15        |                |
| Male/Female              | 12/3            | 13/2      | 1.0            |
| Age(years,mean±SD)       | 33.5±11.1       | 31.7±10.1 | 0.73           |
| Marriage, n(%)           | 11(73.3%)       | 10(66.7%) | 1.0            |
| Height(m, mean±SD)       | 1.68±0.07       | 1.68±0.43 | 0.99           |
| Weight(kg, mean±SD)      | 56.2±11.0       | 54.6±9.1  | 0.67           |
| BMI(kg/m <sup>2</sup> )  | 20.6±4.2        | 18.9±2.3  | 0.18           |
| Smoking, n(%)            | 6(40%)          | 6(40%)    | 1.0            |
| Alcohol consumption,n(%) | 2(13.3%)        | 3(20%)    | 1.0            |
